# Supplementary material for: Transcatheter arterial embolsation is efficient and safe for paediatric blunt torso trauma: a case-control study
Source: Research Square preprint supplement (doi:10.21203/rs.3.rs-51268/v3), 2020-10-27
Supplement: Supplementary file 1 [file 8dcc5b58daa62762577ea204.xlsx]

## Sheet: Table 1
	Table 1. Characteristics and outcome compared between paediatric and adult trauma patients with transcatheter arterial embolisation
	Variable	All patients	Pediatric patients	Adult patients	P-value
		(n=114)	(n=15)	(n=99)
	Male, n (%)	79(69)	11 (73)	68 (69)	0.716
	Age in year, (median, IQR)	43 (22–60)	11 (7–14)	47 (34–64)	＜0.001
	Body weight, kg, (median, IQR)	61(53–69)	39.7(24.1–52.1)	63.2(54.6–69.6)	＜0.001
	Mechanism of injury, n (%)
	Traffic accident	59 (52)	7 (47)	52 (53)	0.7
	Fall from a height	48 (42)	5 (33)	43 (43)	0.46
	Fall at same place	1 (0.9)	1 (7)	0	0.01
	Unspecified	6 (5)	2 (13)	4 (4)	0.133
	Transportation from other hospitals, n (%)	22 (19)	10 (67)	12 (12)	＜0.001
	Injury severity score, (median, IQR)	29(17–41)	26 (10–41)	29 (18–41)	0.719
	Revised trauma score, (median, IQR)	6.66 (5.68–7.84)	7.84 (5.82–7.84)	6.61 (5.56–7.55)	0.031
	Duration of mechanical venrilation, days, (median, IQR)	9 (3–15)	4 (2–16.5)	9 (3–15)	0.468
	Duration of ICU stay, days, (median, IQR)	10 (4–16)	6 (3–16)	11 (4–16)	0.438
	Duration of hospital stay, days, (median, IQR)	34 (13–63)	19 (12–52)	35 (13–66)	0.303
	In-hospital actual mortality rate, (%)	13.2	6.7	14.1	0.165
	Predicted mortality rate, (%)	24.9	18.3	25.9	0.026
	Standardised mortality ratio	0.53012	0.36612	0.544402	–
	IQR, Interquartile range; ICU, intensive care unit

## Sheet: Table 2
	Table 2. Vital sign/blood examination between paediatric and adult trauma patients with transcatheter arterial embolisation upon arrival
	Variable	All patients	Pediatric patients	Adult patients	P-value
		(n=114)	(n=15)	(n=99)
	Patients with hypovolemic shock	104 (91)	12 (80)	92 (93)	0.099
	Non-responder	16 (14)	2 (13)	14 (14)	0.933
	Transient-responder	60 (53)	6 (40)	54 (55)	0.293
	Responder	28 (25)	4 (27)	24 (24)	0.839
	Vital sigh at hospital arrival
	Systolic blood pressure, mmHg, (median, IQR)	109 (84–136)	122 (107–133)	108 (82–141)	0.209
	Diastolic blood pressure, mmHg, (median, IQR)	66 (50–85)	65 (59–73)	67 (46–87)	0.668
	Heart rate, bpm, (median, IQR)	105 (84–124)	113 (102–121)	103 (81–126)	0.323
	Respiratory rate, bpm, (median, IQR)	23 (18–28)	20 (20–27)	23 (17–30)	0.759
	Glasgow Coma Scale, (median, IQR)	13 (7–15)	15 (8–15)	13 (7–14)	0.046
	Body temperature, ℃, (median, IQR)	36.4 (35.8–36.8)	37.1 (36.9–37.3)	36.3 (35.8–36.7)	<0.001
	Blood examination at hospital arrival
	Leucocytes, /μL, (median, IQR)	13010 (8760–17513)	13860 (10810–17230)	12580 (8720–17675)	0.431
	Hemoglobin, g/dL, (median, IQR)	11.9 (10.8–13.3)	11.1 (9.4–11.9)	12.2 (10.9–13.5)	0.006
	Platelet, /μL, (median, IQR)	20.8 (17.1–24.4)	19.5 (15.0–26.7)	20.9 (17.2–24.2)	0.988
	Fibrinogen, mg/dL, (median, IQR)	213 (170–264)	166 (140–311)	218 (177–263)	0.416
	Fibrinogen/fibrin degradation products, μg/mL, (median, IQR)	97.5 (26.4–169.1)	48.2 (12.6–225.4)	98.2 (27.4–164.2)	0.729
	D-dimer, μg/mL, (median, IQR)	48.2 (17.6–95.7)	27.0 (6.7–127.2)	53.4 (20.2–94.3)	0.405
	Base excess, mmol/L, (median, IQR)	–3.7 (–6.3– –1.3)	–0.9 (–2.9– 0.9)	–4.0 (–6.7– –1.8)	0.001
	Lactate, mg/dL, (median, IQR)	3.5 (2.3–5.6)	2.3 (1.3–3.2)	3.7 (2.5–5.9)	0.004
	IQR, Interquartile range; RBC, red cell concentrate; FFP, fresh frozen plasma

## Sheet: Table 3
	Table 3. Blood transfusion comparison in paediatric and adult trauma patients with transcatheter arterial embolisation
	Variable	All patients	Paediatric patients	Adult patients	P-value
		(n=114)	(n=15)	(n=99)
	Blood transfusion during primary trauma care, n (%)	94 (83)	10 (67)	84 (85)	0.084
	RBC	89 (78)	10 (67)	79 (80)	0.252
	FFP	91 ((80)	10 (67)	81 (82)	0.173
	Platelets	30 (26)	1 (7)	29 (29)	0.051
	Time interval from hospital arrival to beginning of blood tranfusion, minutes, (median, IQR)
	RBC	40 (23–78)	56 (34–78)	40 (22–77)	0.441
	FFP	84 (56–111)	91 (47–113)	84 (57–111)	0.874
	Platelets	143 (115–160)	78 (78–78)	145 (119–161)	0.067
	Dosage of blood transfusion, International Units per body weight, (median,IQR)
	RBC	0.1 (0.03–0.2)	0.10 (0–0.2)	0.1 (0.04–0.2)	0.919
	FFP	0.2 (0.04–0.2)	0.1 (0–0.2)	0.2 (0.1–0.2)	0.488
	Platelets	0 (0–0)	0 (0–0)	0 (0–0.2)	0.133
	IQR, Interquartile range; RBC, red cell concentrate; FFP, flozen fresh plasma

## Sheet: Table 4
	Table 4. Summary of intervention radiology compared between paediatric and adult trauma patients with transcatheter arterial embolisation
	Variable	All patients	Paediatric patients	Adult patients	P value
		(n=114)	(n=15)	(n=99)
	Treatment before IVR, n (%)
	Resuscitative endovascular balloon of the aorta	4 (4)	1 (7)	3 (3)	0.476
	Surgical intervention	31 (27)	5 (33)	26 (26)	0.566
	Time interval, minutes, (medican, IQR)
	from arrival to biginning of IVR	89 (72-120)	78 (66-132)	89 (74-119)	0.299
	from biginning to end of IVR	66 (48-73)	55 (43-59)	65 (51-76)	0.007
	Size of catheter sheath, French Gauge, (median, IQR)	6 (5-6)	5 (4-5)	6 (5-6)	<0.001
	Embolic agents, n (%)
	Coils	49 (43)	6 (40)	43 (43)	0.802
	Gelatin particles	102 (90)	13 (87)	89 (90)	0.704
	NBCA	71 (62)	7 (47)	64 (65)	0.181
	Target region of embolisation, n (%)
	Chest and/or abdominal region	99 (87)	13 (87)	86 (87)	0.983
	Pelvic region	88 (77)	4 (27)	84 (85)	<0.001
	Target artery of embolization, n (%)
	Internal thoracic artery	1 (1)	0	1 (1)	0.696
	Intercostal artery	6 (5)	3 (20)	3 (3)	0.006
	Phrenic artery	6 (5)	1 (7)	5 (5)	0.794
	Splenic artery	21 (18)	5 (33)	16 (16)	0.11
	Hepatic artery	20 (18)	4 (27)	16 (16)	0.319
	Renal artery	10 (9)	1 (7)	9 (9)	0.757
	Adrenal artery	7 (6)	3 (20)	4 (4)	0.016
	Colonic artery	2 (2)	0	2 (2)	0.579
	superio mesenteric artery	1 (1)	0	1 (1)	0.697
	Inferio mesenteric artery	2 (2)	0	2 (2)	0.579
	Gastroduodenal artery	1 (1)	0	1 (1)	0.697
	Pelvic artery	75 (66)	4 (27)	71 (71)	0.001
	lumbar artery	48 (42)	4 (27)	44 (44)	0.194
	Degree of hemorrhage control, n (%)
	Effective haemorrhage control	101 (89)	14 (93)	87 (88)	0.536
	Ongoing haemorrhage	9 (8)	1 (7)	8 (8)	0.85
	Exsanguination and death	4 (4)	0	4 (4)	0.428
	Repeated IVR, n (%)	4 (4)	0	4 (4)	0.428
	Patients with complications, n (%)
	Major	2 (2)	0	2 (2)	0.579
	Minor	1 (1)	0	1 (1)	0.696
	IQR, Interquartile range; TAE, transcatheter arterial embolization; IVR, interventional radiology; NBCA, n-butyl-2-cyanoacrylate

## Sheet: Table 5
	Table 5. Detailed summary of paediatric patients with transcatheter arterial embolisation
	Case	Age, year	Mechanism of injury	Transportation method	Total transfer time from injury to arrival at our hospital, minutes	Target region of embolisation	Revised trauma score	Injury severity score	Predicted survival rate, %	Patients with hypovolemic shock	Treatment before IVR	Size of catheter sheath, French	Embolic agents	Time interval from arrival to biginning of IVR, minutes	Time interval from beginning to end of IVR, minutes	Degree of haemorrhage control	IVR repeated	Complication	ICU stay, days	Hospital stay, days	Outcome
	1	4	Fall from a height	From another hospital	276	Chest / abdominal region	7.55	9	99.3	Transient-responder	None	5	Coils	48	61	Effective control	None	None	6	9	Alive
	2	5	Fall from a height	From the site of injury	48	Chest / abdominal region	7.8408	16	99.4	Non-shock	None	4	Gelatin particles, Coils	149	26	Effective control	None	None	3	23	Alive
	3	5	Fall from a height	From another hospital	293	Chest / abdominal region	2.338	59	3	Non-responder	Surgical intervention	4	Gelatin particles, NBCA	90	60	Effective control	None	None	70	109	Alive
	4	7	Traffic accident	From another hospital	140	Pervic region	7.841	26	97.6	Transient-responder	None	5	Gelatin particles	68	45	Effective control	None	None	17	58	Alive
	5	7	Traffic accident	From the site of injury	26	Chest / abdominal / pervic region	4.09	43	32.5	Responder	Surgical intervention	4	Gelatin particles, Coils、NBCA	785	55	Effective control	None	None	8	19	Death
	6	8	Fall at same place	From another hospital	273	Chest / abdominal region	7.8408	9	99.6	Non-shock	None	5	Gelatin particles, Coils	38	42	Effective control	None	None	3	9	Alive
	7	9	Traffic accident	From another hospital	215	Chest / abdominal region	7.84	26	97.6	Transient-responder	None	4	Gelatin particles	57	67	Effective control	None	None	6	13	Alive
	8	11	Traffic accident	From another hospital	214	Pelvic region	7.84	9	99.4	Responder	None	5	Gelatin particles	69	57	Effective control	None	None	1	6	Alive
	9	11	Fall from a height	From another hospital	281	Chest / abdominal / pervic region	7.84	34	99.5	Responder	None	5	Gelatin particles, NBCA	71	57	Effective control	None	None	4	46	Alive
	10	12	Unspecified	From another hospital	113	Chest / abdominal region	7.841	27	94.9	Responder	None	5	Gelatin particles, NBCA	89	53	Effective control	None	None	4	19	Alive
	11	14	Traffic accident	From another hospital	432	Chest / abdominal region	7.8408	10	99.4	Non-shock	None	6	Gelatin particles, Coils	64	24	Effective control	None	None	3	11	Alive
	12	14	Unspecified	From another hospital	3 days	Chest / abdominal region	7.108	9	98.9	Transient-responder	None	5	Gelatin particles, Coils	72	46	Ongoing hemorrhage	None	None	3	15	Alive
	13	14	Traffic accident	From the site of injury	45	Chest / abdominal region	5.9672	50	76.9	Transient-responder	Surgical intervention	5	Gelatin particles, NBCA	162	35	Effective control	None	None	27	73	Alive
	14	15	Traffic accident	From the site of injury	39	Chest / abdominal region	5.0304	41	60.9	Transient-responder	Surgical intervention	5	Gelatin particles, NBCA	116	59	Effective control	None	None	23	42	Alive
	15	15	Fall from a height	From the site of injury	43	Chest / abdominal region	5.676	41	67.2	Non-responder	REBOA, Surgical intervention	6	NBCA	180	61	Effective control	None	None	15	64	Alive
	REBOA, Resuscitative endovascular balloon occlusion of the aorta; IVR, interventional radiology; NBCA, n-butyl-2-cyanoacrylate
